# Supplementary material for: Efficient generation of region-specific forebrain neurons from human pluripotent stem cells under highly defined condition
Source: PubMed Central journal article supplement (PMC4680876; doi:10.1038/srep18550), 2015-12-16
Supplement: srep18550-s1.pdf [file srep18550-s1.pdf]

## Supplementary information

### Efficient generation of region-specific forebrain neurons from human pluripotent stem cells under highly defined condition

Fang Yuan<sup>1#</sup>, Kai-Heng Fang<sup>1#</sup>, Shi-Ying Cao<sup>1</sup>, Zhuang-Yin Qu<sup>1</sup>, Qi Li<sup>1</sup>, Robert Krencik<sup>2</sup>, Min

Xu<sup>1</sup>, Anita Bhattacharyya<sup>3</sup>, Yu-Wen Su<sup>1</sup>, Dong-Ya Zhu<sup>1\*</sup>, and Yan Liu<sup>1\*</sup>

1 Institute for Stem Cell and Neural Regeneration, School of Pharmacy, Nanjing Medical University, Nanjing, China

2 Department of Ophthalmology, University of California, San Francisco, San Francisco, CA 94143, USA

3 Waisman Center, University of Wisconsin, Madison, WI, USA

#Equal contribution

\*Correspondence: [yanliu@njmu.edu.cn](mailto:yanliu@njmu.edu.cn) , [dyzhu@njmu.edu.cn](mailto:dyzhu@njmu.edu.cn)

**Supplementary Figure S1**  
**Supplementary Figure S2**  
**Supplementary Figure S3**  
**Supplementary Figure S4**  
**Supplementary Table S1**  
**Supplementary Table S2**

### **Supplementary Figure S1**

- (a) hPSCs cultured on Matrigel or VTN-NC with/without the treatment of Y27632 after passage 1 day.
- (b) The morphology of hPSCs cultured on Matrigel or VTN-NC with/without the treatment of Y27632 after passage for 3 days.
- (c) Bright field and immunostaining images of NANOG and SOX2 of hPSCs cultured with/without the treatment of Y27632.
- (d) AP staining of hPSCs cultured with/without the treatment of Y27632.
- (e) hPSCs cultured on vitronectin and in E8 medium expressed pluripotent marker SOX2 and NANOG after 20 passages.

### **Supplementary Figure S2**

- (a) Schematic of differentiating hiPSC lines DS1 and DS2U to EBs in different conditions.
- (b,c) Day 1 EB formation of DS1 (b) and DS2U (c) under different conditions.

### **Supplementary Figure S3**

- (a) Timeline of direct differentiation of hiPSC DS1 and DS2U to cortical neurons in optimized xeno-free system without purmorphamine.
- (b,c) At d32, PAX6 and  $\beta$ III-tubulin double positive neurons were derived from DS1 (b) and DS2U (c).
- (d,e) Quantifications of PAX6<sup>+</sup> and  $\beta$ III-tubulin<sup>+</sup> cells of total cells in DS1 (d) and DS2U (e) cell lines.

### **Supplementary Figure S4**

- (a) Timeline of direct differentiation of GABA interneurons from DS1 and DS2U iPSC lines with

the treatment of 1.5  $\mu$  M purmorphamine.

(b,c) At d35, DS1 (b) and DS2U (c) iPSCs differentiated to GABA interneurons that co-expressing GABA and  $\beta$ III-tubulin.

(d,e) Quantifications of GABA<sup>+</sup> and  $\beta$ III-tubulin<sup>+</sup> cells of total cells in DS1 (d) and (e) cell lines.

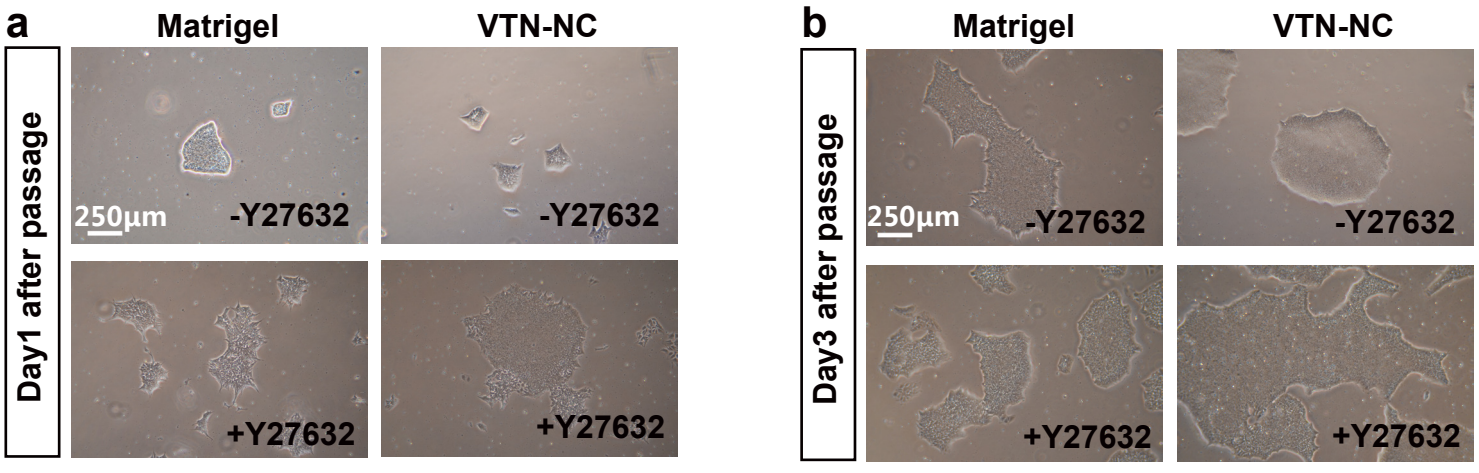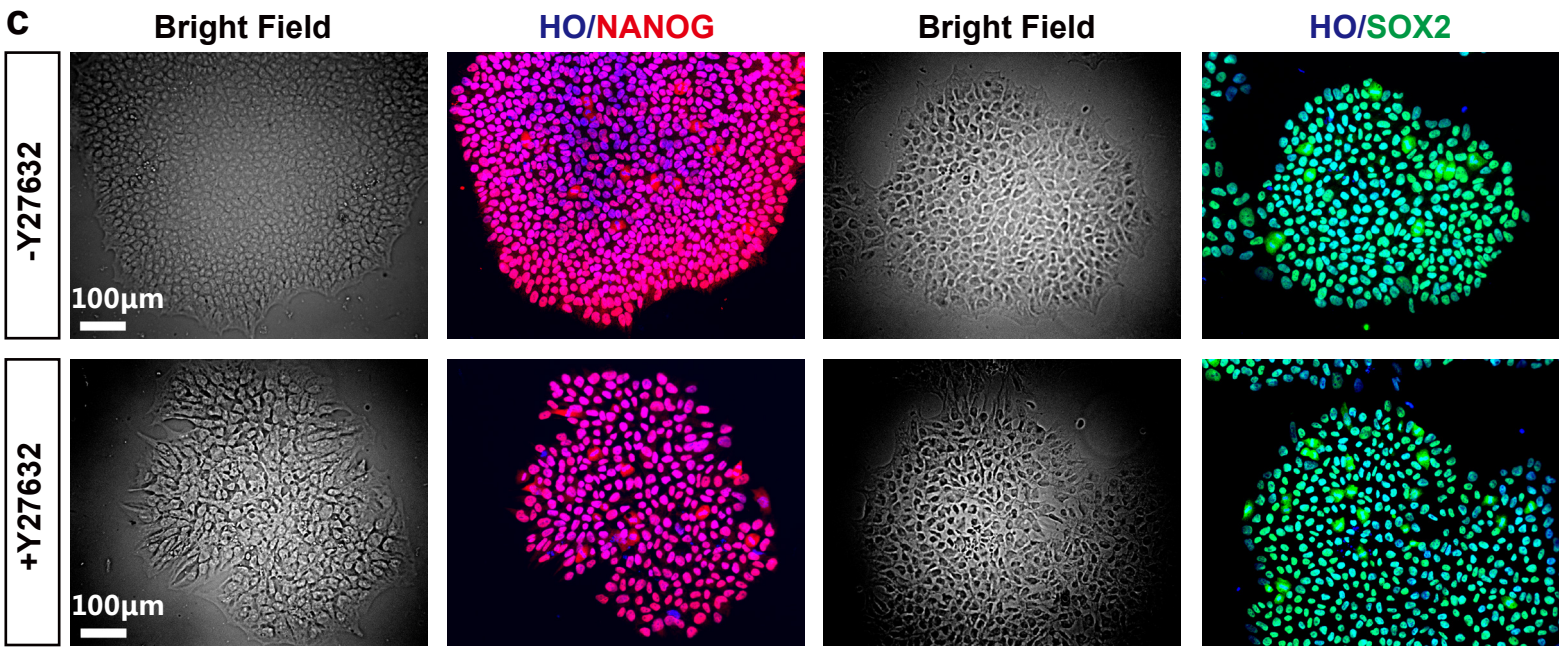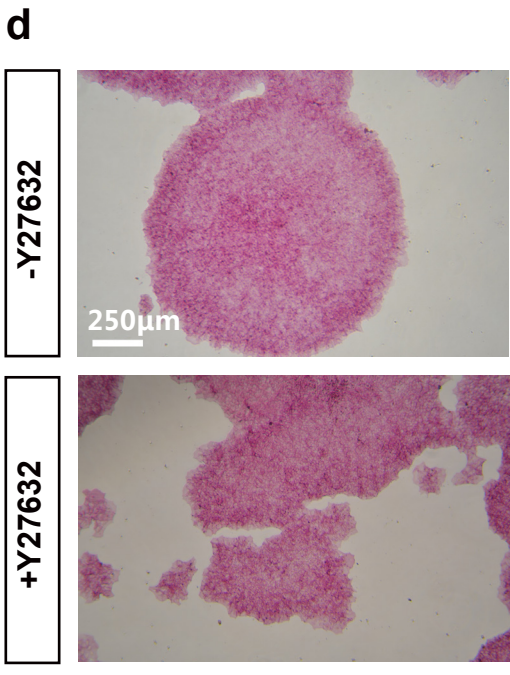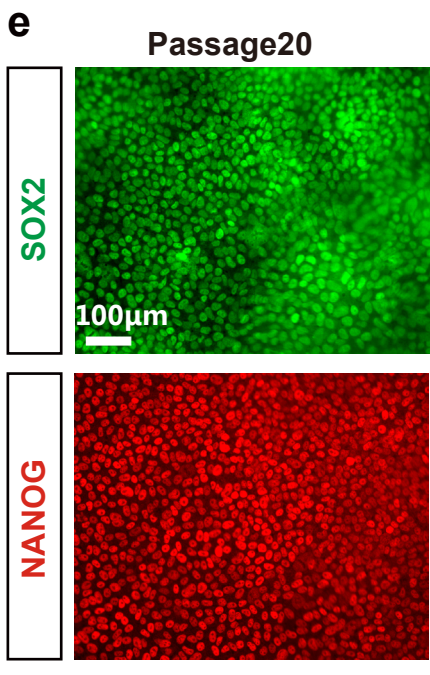

Supplementary Figure S1



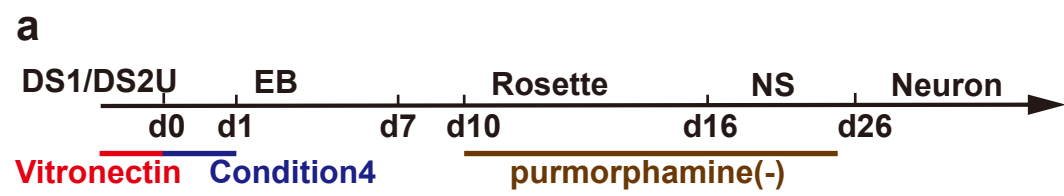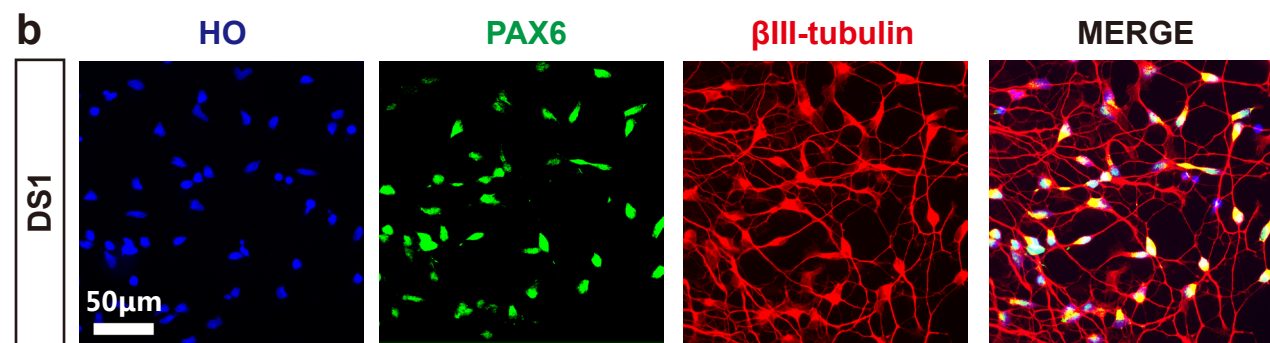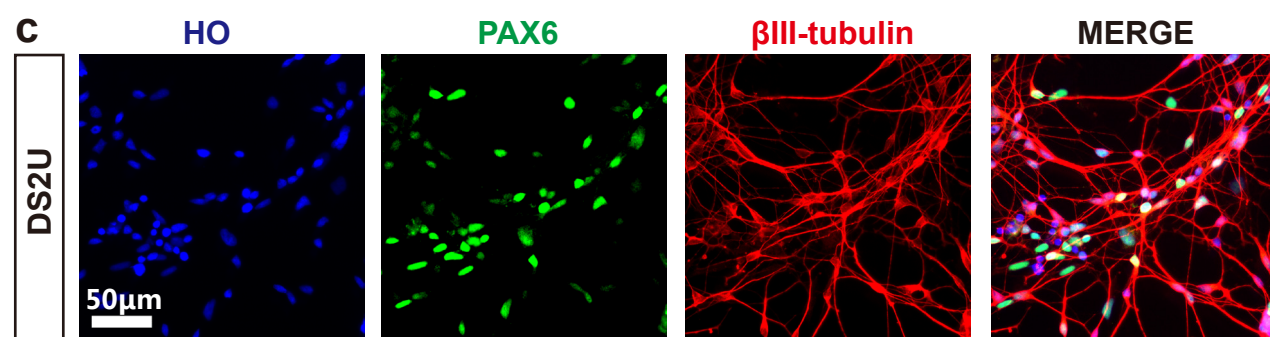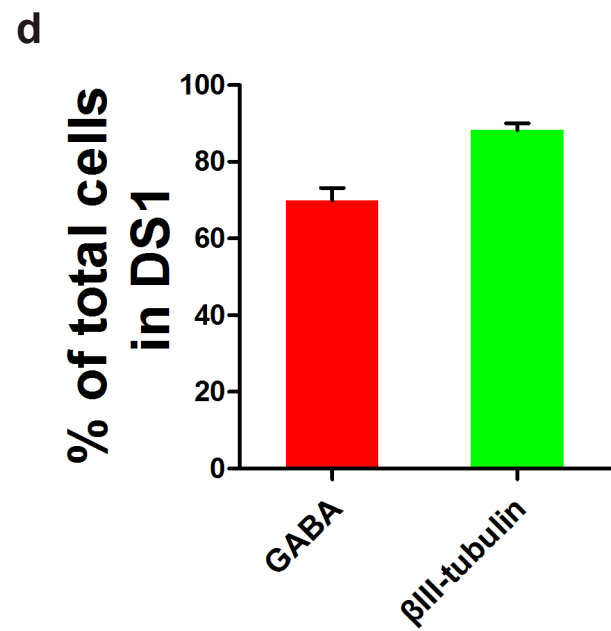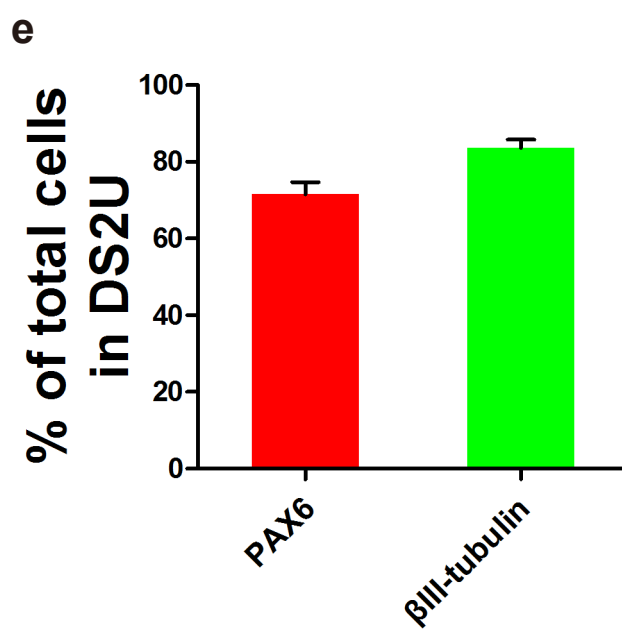

Supplementary Figure S3

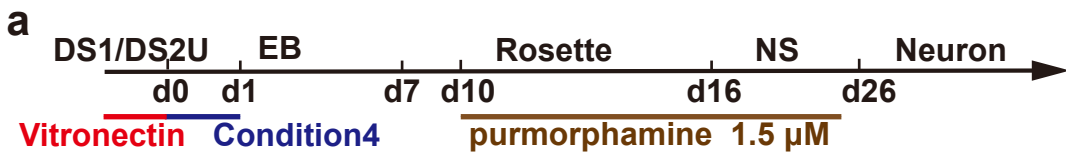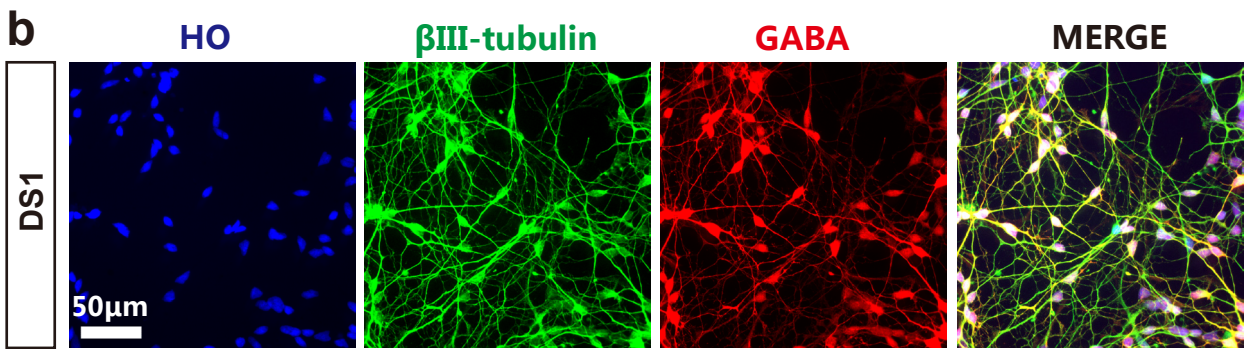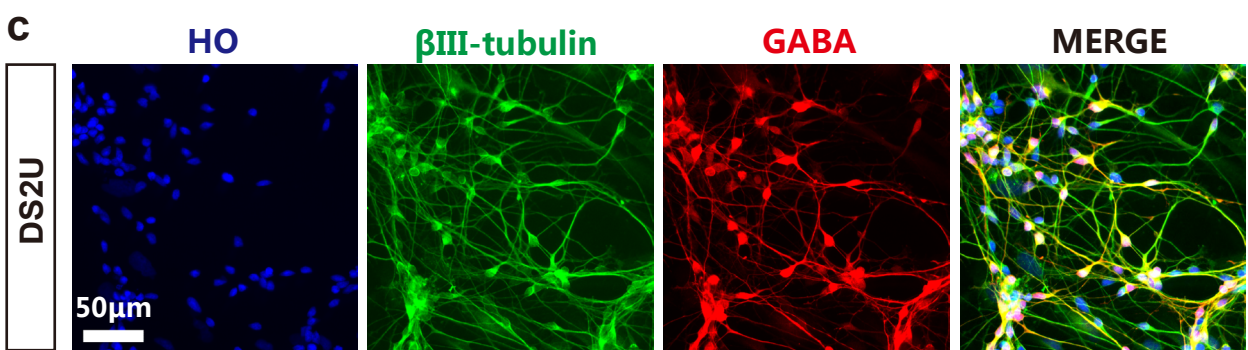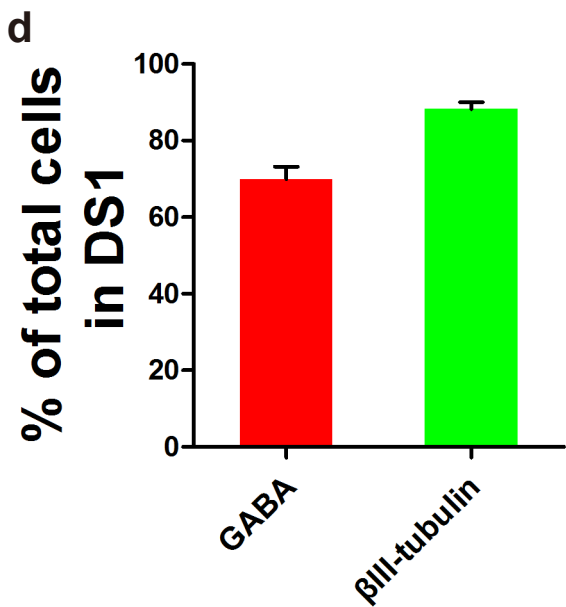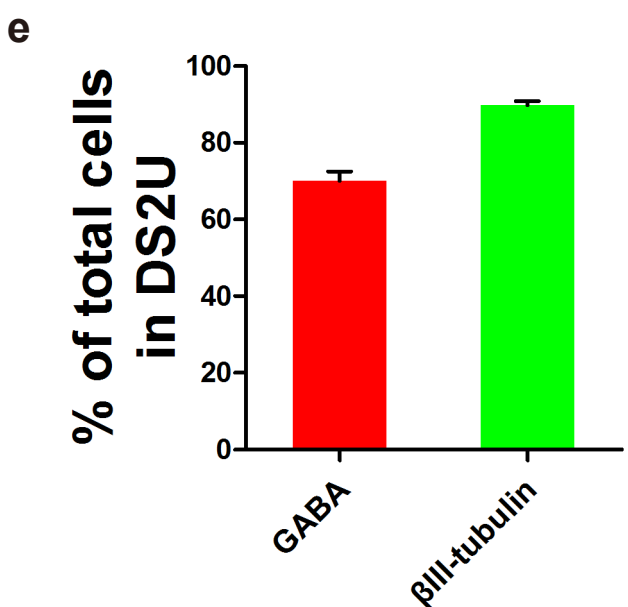

Supplementary Figure S4

## Supplementary Table S1

| Antibody                       | Isotype    | Dilution | Source(cat. no.)                    |
|--------------------------------|------------|----------|-------------------------------------|
| Calbindin(CB)                  | Rabbit IgG | 1:1000   | Abcam(AB1778)                       |
| DARPP-32                       | Rabbit IgG | 1:2000   | Epitomics(1710-1)                   |
| DCX                            | Rabbit IgG | 1:1000   | Cell Signal Technology(4604)        |
| FOXG1                          | Rabbit IgG | 1:1000   | Abcam(AB18259)                      |
| GABA                           | Rabbit IgG | 1:1000   | Sigma-Aldrich(A2052)                |
| GAD67                          | Mouse IgG  | 1:1000   | Chemicon and Millipore(MAB5406)     |
| GFAP                           | Rabbit IgG | 1:1000   | Dako(Z0334)                         |
| Islet1                         | Mouse IgG  | 1:500    | DSHB, Iowa City, IA(40.2D6)         |
| Map2                           | Mouse IgG  | 1:1000   | Sigma-Aldrich(M1406)                |
| Meis2                          | Goat IgG   | 1:1000   | Santa Cruz biotechnology(SC-10599)  |
| Nanog                          | Goat IgG   | 1:200    | R&D Systems(AF1997)                 |
| Nkx2.1                         | Mouse IgG  | 1:500    | Chemicon and Millipore(MAB5460)     |
| Olig2                          | Goat IgG   | 1:400    | Santa Cruz biotechnology(SC-19969)  |
| PAX6                           | Rabbit IgG | 1:1000   | Covance Research Products(PRB-278P) |
| PAX6                           | Mouse IgG  | 1:1000   | DSHB, Iowa City, IA(PAX6)           |
| Parvalbumin(PV)                | Mouse IgG  | 1:1000   | Sigma-Aldrich(P3088)                |
| Sox1                           | Goat IgG   | 1:1000   | R&D Systems(MAB3369)                |
| Sox2                           | Goat IgG   | 1:1000   | R&D Systems(BAF2018)                |
| Somatostatin and Receptor(SST) | Rat IgG    | 1:500    | Chemicon and Millipore(MAB354)      |
| Synapsin                       | Rabbit IgG | 1:1000   | MERCK(574777)                       |
| $\beta$ -III Tubulin           | Mouse IgG  | 1:2000   | Sigma-Aldrich(T8660)                |
| vGlut1                         | Mouse IgG  | 1:1000   | Synaptic Systems(135311)            |



## Supplementary Table S2

| Reagent                                                               | Ingredient<br>(Working Concentration)                                                                      | Feature                                                                            |
|-----------------------------------------------------------------------|------------------------------------------------------------------------------------------------------------|------------------------------------------------------------------------------------|
| E8(Essential 8) Gibco,cat.no.A1517001                                 | DMEM-F12<br>L-Ascorbic Acid<br>Selenium<br>Holo-transferrin<br>Sodium butyrate<br>Insulin<br>bFGF<br>TGFB1 | xeno-free,serum free                                                               |
| NIM(Nerual induced medium)                                            | DMEM/F-12(1X)<br>NEAA(100X)<br>N2 SUPPLEMENT(100X)                                                         | xeno-free,serum free                                                               |
| DMEM/F-12<br>Gibco, cat. no. 11330                                    |                                                                                                            | xeno-free,serum free                                                               |
| NEAA(MEM non-essential amino acids solution)<br>Gibco, cat. no. 11140 |                                                                                                            | xeno-free,serum free                                                               |
| N2 SUPPLEMENT<br>Gibco, cat. no. 17502-048                            | Human Transferrin (Holo)<br>Insulin Recombinant Full Chain<br>Progesterone<br>Putrescine<br>Selenite       | Protein(human source)<br>Protein(human source)<br>Compound<br>Compound<br>Compound |
| VTN-NC(Vitronectin)<br>Gibco, cat. no. A14700                         | 5µg/ml                                                                                                     | Human recombination                                                                |
| hEGF(Epidermal Growth Factor)<br>Gibco, cat. no.PHG0311               | 10ng/ml                                                                                                    | Human recombination                                                                |
| FGF2(Fibroblast growth factor 2)<br>R&D, cat. no. 233-FB              | 10ng/ml                                                                                                    | Human recombination                                                                |
